# Supplementary material
Source: Research Square preprint supplement (doi:10.21203/rs.3.rs-9149499/v1)
Supplement: Supplementary file 1 [file 1221516373bb93751be401ff.docx]

**SUPPORTING INFORMATION**

## Breaking Glycolysis: Allosteric Hotspots for Multi-Target Drug Repurposing

## Latife Sude Vural1,Elcin Kahraman2, Simay Mintemur2, Sinem Urhan2, E. Demet Akten2*

*1Graduate Program of Computational Sciences and Engineering, Graduate School of Science and Engineering, Kadir Has University, Istanbul, Turkey*

*2Department of Molecular Biology and Genetics, Faculty of Engineering and Natural Sciences, Kadir Has University, Istanbul, Turkey*

*Corresponding Author

[demet.akten@khas.edu.tr](mailto:demet.akten@khas.edu.tr)

+90 212 533 65 32 (x1350)

<https://orcid.org/0000-0002-0358-3171>

**Supplementary Table 1**. Binding site residues for all identified binding sites, which are evaluated for allosteric potential in Fructose 1,6-Bisphosphate Aldolase, TIM, and Fructose 1,6-Bisphosphate Aldolase.

| **Site ID** | **Aldolase** | **TIM** | **PGM** |
| --- | --- | --- | --- |
| 1 | **A:**L3-S5/I97/G100-T102/  K130-V132 | **A:**A49-I52/L54/A73-Y77/F84-T88/L93/R108  **B:**A49-A51/A73-Y77/F84-T88/R108 | V75/R81-I86/G89/I311-Q316/506 |
| 2 | **A:**P1/E8-M9/D12/Y18/P44-I46/I78-A81/R284-H287 | **BS2.1.B:**K170-V173/A215-R217  **BS2.2.B:**S8/R10-P12/M233-T236/I238-D239 | G22-A24/P31/F33-D34/  N38/P41/I45/V470/L472 |
| 3 | **A:**S109/S111-F113/N116/  L138-T140/I154/E160 | **BS3.1.A:**S8/R10/P12/M233-T236/I238-D239  **BS3.2.A:**Y100/L169-V173/A215-R217 | N172/I176/F179/Y186-A188/A222-E226/N246/  D249 |
| 4 | **A**:N27/F30/Q237/S240-A241/V244/L261  **B:**Y255-R258/Y260-L261 | **A:**G104-S106/R109-E110/C136-T140/E143/V152/Q156/E177/I179 |  |
| 5 | **B:**M9/D12/Y18/P44/P79/  R284-K286 | **A:**L57-T58/V61-K62/G68-I71/L96-K99 |  |
| 6 | **B:**I97/G100-T102/K130-V132 | **B:**T58//V61-K62/G68-I71/L96-K99 |  |

**Supplementary Table S2.** List of all residues observed in each selected druggable site for docking across all 10 glycolytic enzymes.

| **Druggable Site ID** | ***BS #1*** | ***BS #2*** | ***BS #3*** |
| --- | --- | --- | --- |
| 1.Hexokinase | **A:**L307/D310-R318  **B:**V37-V51/N53/Y56/E57/S78/  F296-P304/D306/L307/D310/S317/  L320/R405/L409  **C:**Y56-E57/K59-G61/E63-P69/  L71/I73-C77/K281-K283/K298 |  |  |
| 2. PGI | **A:**Y85/L86/R89/I92/T96/S97/F99/E107-F110/N113/H114/Y119/P270/N300/  T303/D304/  **B:**Y85/L86/R89/I92/T96/S97/F99/Y105-F110/N113/H114/A217/P270/Y274/  N300/T303/D304 | **B:**W47/L50-V63/G87/A91/I92  /Y173/F193-D197/V205-L211  /I214/A215/I219-A223/I226-K230/E385/E386/G389/Y390/  V392/Y393/E396 |  |
| 3. PFK | **A**:N130/D136-T143/L145/N146/W181/  T259-D262/V264-A266/R268/I288-N291  **B:**F137-T143/L145/N146/W181/T259-D262/V264-A266/R268/I288/N291  **C:**N130/F137-T143/L145/N146/W181/  T259/G260-D262/V264/A266/R268/  I288/N291  **D:**N130/F137-T143/W181/T259-D262/V264-A266/R268/I288/N290/N291 | **A:**R21/R25/D59/R156/  V186-E189/K215/I322  **B:**R21/R25/D59/R156/  V186-E189/K215/I322  **C:**R21/R25/D59/R156/  V186-E189/K215/I322  **D:**R21/R25/D59/R156/  V186-E189/K215/I322 |  |
| 4. Aldolase | **A:**L3-S5/I97/G100-T102/K130-V132 | **A**:N27/F30/Q237/S240-A241/  V244/L261  **B:**Y255-R258/Y260-L261 |  |
| 5. TIM | **A:**A49-I52/L54/A73-Y77/F84-T88/L93/  R108  **B:**A49-A51/A73-Y77/F84-T88/R108 | **BS2.1.B:**K170-V173/A215-R217  **BS2.2.B:**S8/R10-P12/M233-T236/I238-D239 |  |
| 6. GADPH | **A**:D48-R53/Y180/A203-N205/P236-A238  **B:**D48-M50/A203-N205/P236/T239/S281/D282/V284  **C:**A203/E204/P236  **D:**D48-G52/A203/E204/P236/S281-V284 |  |  |
| 7. PGK | N35/Q39/L175/K178-E179/ I360/E365-T373 |  |  |
| 8. PGM | V75/R81-I86/G89/I311-Q316/506 |  |  |
| 9. Enolase | **B:**V90/L94/L303/T306-D311/N324L330/  I332-N338/I347/T351/E352/D355/A356/  E358-A360/L362-Y365/G391/D424/I426-L434  **E:**T306-D311/T325/E326/A329/L330/I332-N338/D355/A356/E358-A360/L362-Y365/  G391/Y420-D424/I426-L434 |  |  |
| 10. PK | **A:**K260/R264/N267/N299/Y302-G304/  A337-Y340/K342/L343/D346/R347  **B:**K260/N299/Y302/D303/A337-Y340/  K342/L343/D346  **C:**K260/R264/N267/N299/Y302/D303/  D346/R347  **D:**Y302/Q338-Y340/K342/L343 | **A**:T353/A358/I361/S362/H365/T366/N369  **B:**T353/A358/I361/S362/H365/T366/N369/L370  **C:**T353/A358/I361/S362/H365/T366/N369  **D:**A358/I361/S362/H365/T366/N369/L370 | **A:**K271  **B:**G481/G483/  R484/A572-Q574 |

**Supplementary Table S3.** Substrate and cofactor binding site residues for all ten enzymes

| **Druggable Site ID** | **Substrate** | **Cofactor** |
| --- | --- | --- |
| 1. Hexokinase | **A.B.C.D:**R109/D241/I265/G267-G268/  D434-S436/D470-G473 | **A.B.C.D:**D17-I19/L40/I42/K397/E400-S401/  N404-R405/W443/K446-R447/E450 |
| 2. PGI | **A.B:**K139**/**E145/R202/E285/K289/H306/S307/Y419/K420 |  |
| 3. PFK | **A:**G11/R72/I128/D129/M171-R173/E224/  H251/R254;**D:**R164,R245  **B**:R72/T127-D129/D131/M171-R173/E224/  H251/R254;**C:**R245  **C**:R72/T127-D129/M171-R173/E224/H251/  R254;**B:**R245  **D:**G11/D12/R72/I128/D129/M171-R173/  H251/R254;**A:**R164/R245 | **A**:G11/R72-P74/K77/G102-S105/R107/T127/D129/D131/R173  **B**:G11/C73/P74/K77/G102-S105/R107/D129/D131/R173  **C**:G11/R72-P74/K77/G102-S105/R107/D129/D131/R173  **D**:G11/R72-P74/K77/G102-S105/R107/D129/D131/R173 |
| 4. Aldolase | **A.B:**D85-H86/E137/D144/H181/H209-G210/N233 |  |
| 5. TIM | **A:**K19/H105/E177/I182/G221-K225/L242-A246  **B:**K19/I182/G221-K225/L242-A246 |  |
| 6. GADPH | **A:**S150-T152/H178/T181/T211/R234/Y314/  N316  **B:**S150-T152/H178/T181/T211/R234/Y314  **C:**S150-T152/T176/H178/T181/T211/R234/  Y320  **D:**S150-T153/T176/H178/T181/T211/N316/  Y320 | **A:**N8-I13/N33-L35/E77/P78/C96-T101/  S120/A121/S151/T181/N316/E317/Y320;**D:**P190  **B:**N8-I13/N33-L35/E77/P78/C96-T101/  S120/A121/S151/T181/N316/E317/Y320;**C:**P190  **C:**N8-I13/N33-L35/E77/P78/C96-T101/  S120/A121/S151/T181/N316/E317/Y320;**B:**P190  **D:**N8-I13/N33-L35/E77/P78/C96-T101/  S120/A121/S151/T181/N316/E317/Y320;**A**:P190 |
| 7. PGK | D21/N23/H59/K62/R119/G152-T153/H155-R156/H158/G374-A377 | G199-A201/D205-K206/G224/G225/Y228/G294-M295/N318-E325/G351-A356 |
| 8. PGM | E56/N61-E63/G65-I69/A71-G72/E87-D88/  K127-A131/L133/K162/S264-E265/  V463-I464 |  |
| 9. Enolase | **A.C.E.G:**E166/E207/D244/E291/D318/L341/K343/S370-S373/K394  **B.D.F.H:**S39/E166/E207/D244/E291/D318/L341/K343/H371-G374/K394 |  |
| 10. PK | **A.B:**K219/E221/M240-M246/A276/T277  **C.D:**R32/K219/V241-M246/A276/T277 | **A**:T9/I10/R32/N34/S36-G38/E42/H43/R46/D245/  S311/G312/A315  **B:**T9/I10/R32/N34/S36-G38/E42/H43/R46/S311/  G312/A315  **C:**R32/N34/S36-G38/E42/H43/R46/D245/S311  **D:**R32/N34-G38/E42/H43/R46/D245/S311 |

**Suppl Figure 1.** Correlation between ChemPLP scores and the square root of the total number of heavy atoms. Blue: raw ChemPLP scores plotted against the square root of heavy atom counts. Yellow: ChemPLP scores normalized by the square root of the total number of heavy atoms, plotted against the same.
